# Supplementary material for: Copolymers of 4-Trimethylsilyl Diphenyl Acetylene and 1-Trimethylsilyl-1-Propyne: Polymer Synthesis and Luminescent Property Adjustment
Source: MDPI journal article supplement (doi:10.3390/molecules28010027), 2022-12-21
Supplement: s1 [file s1]

# Supporting Information for

## Copolymer of 4-trimethylsilyl diphenyl acetylene and 1-trimethylsilyl-1-propyne: Polymer synthesis and luminescent property adjustment

Tanxiao Shen <sup>1</sup>, Manyu Chen <sup>1</sup>, Haoke Zhang <sup>1,2,3</sup>, Jing Zhi Sun <sup>1,2,\*</sup> and Ben Zhong Tang <sup>1,4</sup>

<sup>1</sup> MOE Key Laboratory of Macromolecular Synthesis and Functionalization, Department of Polymer Science and Engineering, Zhejiang University, Hangzhou 310027, China

<sup>2</sup> Centre of Healthcare Materials, Shaoxing Institute, Zhejiang University, Shaoxing, 312000, China

<sup>3</sup> ZJU-Hangzhou Global Scientific and Technological Innovation Center, Hangzhou 311215, China

<sup>4</sup> Shenzhen Institute of Aggregate Science and Technology, School of Science and Engineering, The Chinese University of Hong Kong, Shenzhen 518172, China

\* Correspondence: sunjz@zju.edu.cn Tel.: 0086 13958091775.

### Content

|                                                                                                                                  |    |
|----------------------------------------------------------------------------------------------------------------------------------|----|
| Figure S1. FTIR spectra of TMSP, PTMSP, TMSDPA and PTMSDPA .....                                                                 | S2 |
| Figure S2. FTIR spectra of PTMSP, P1, P2 and PTMSDPA .....                                                                       | S3 |
| Figure S3. FTIR spectra of P5, P6, P7, P8 and P9.....                                                                            | S4 |
| Figure S4. <sup>1</sup> H NMR spectra of PTMSP, P7 and PTMSDPA. ....                                                             | S5 |
| Figure S5. UV-vis spectra of P10 and P11 in THF solution .....                                                                   | S6 |
| Figure S6. PL spectra of P10 and P11 powders.....                                                                                | S6 |
| Figure S7. Fluorescence photos of P6 in THF solution (10 <sup>-3</sup> M) and powder under 365 nm light .....                    | S6 |
| Figure S8. PL behavior of P7 and the plot of peak intensity of P7 in THF/water mixtures with different water fractions.....      | S7 |
| Figure S9. PL behavior of PTMSDPA and the plot of peak intensity of P7 in THF/water mixtures with different water fractions..... | S7 |
| Table S1. The quantum yield for the suspensions of PTMSDPA, P6 and P7 .....                                                      | S8 |

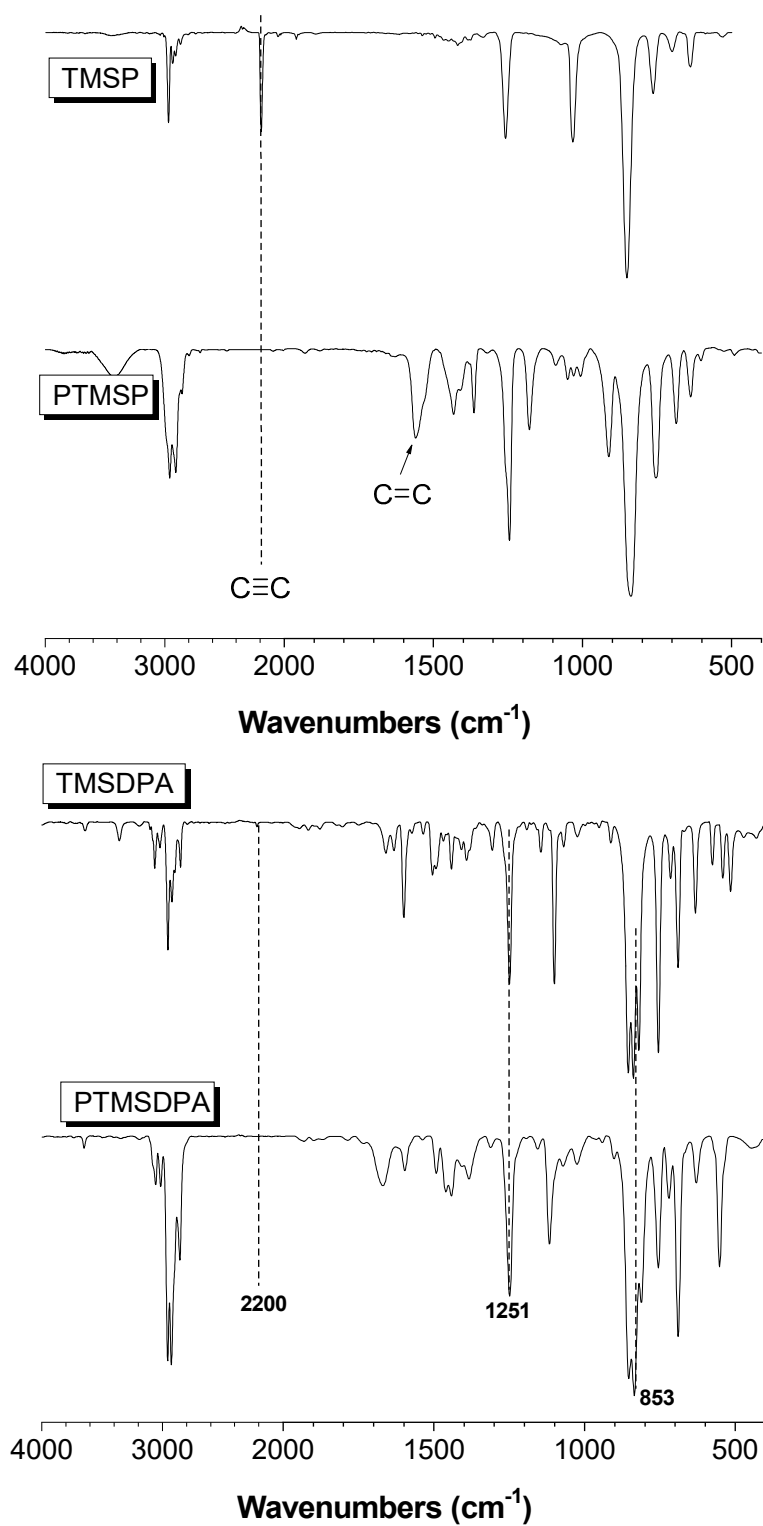

**Figure S1.** FTIR spectra of TMSP, PTMSP, TMSDPA and PTMSDPA in KBr pellets.

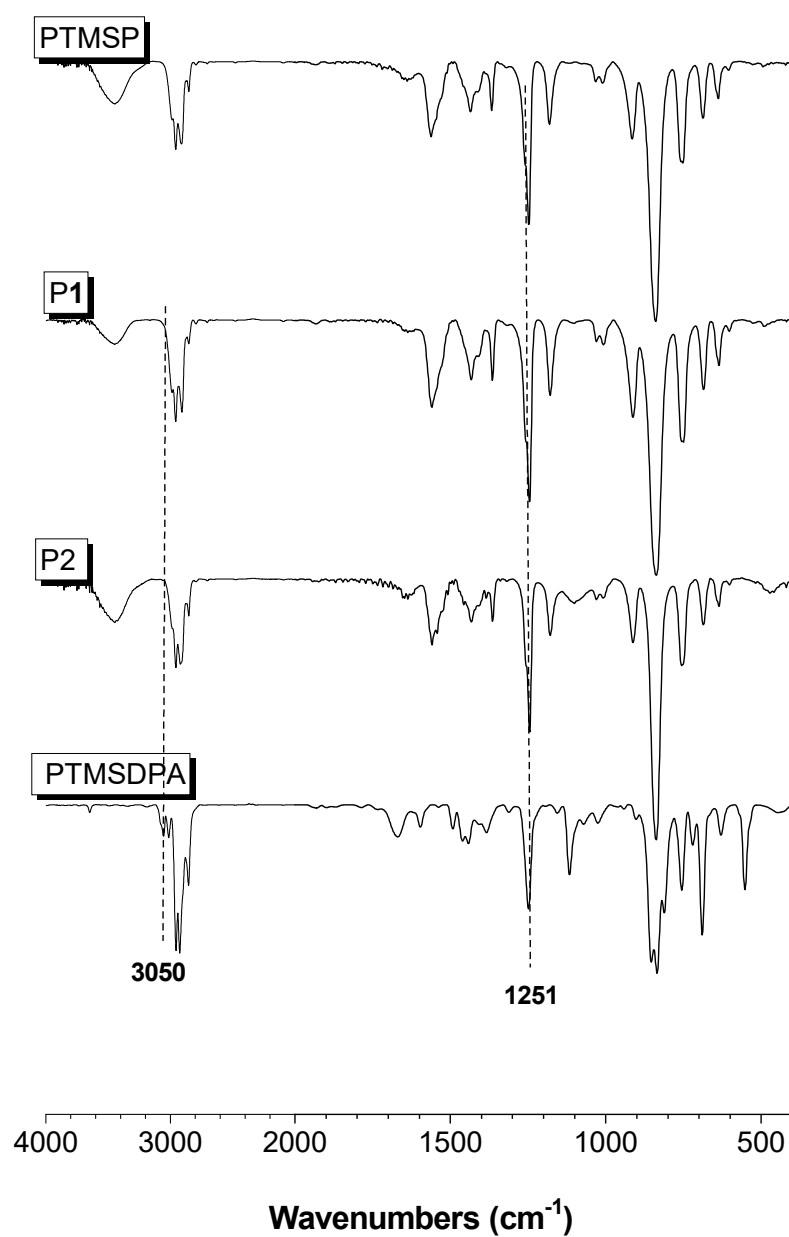

**Figure S2.** FTIR spectra of PTMSP, P1, P2 and PTMSDPA in KBr pellets.

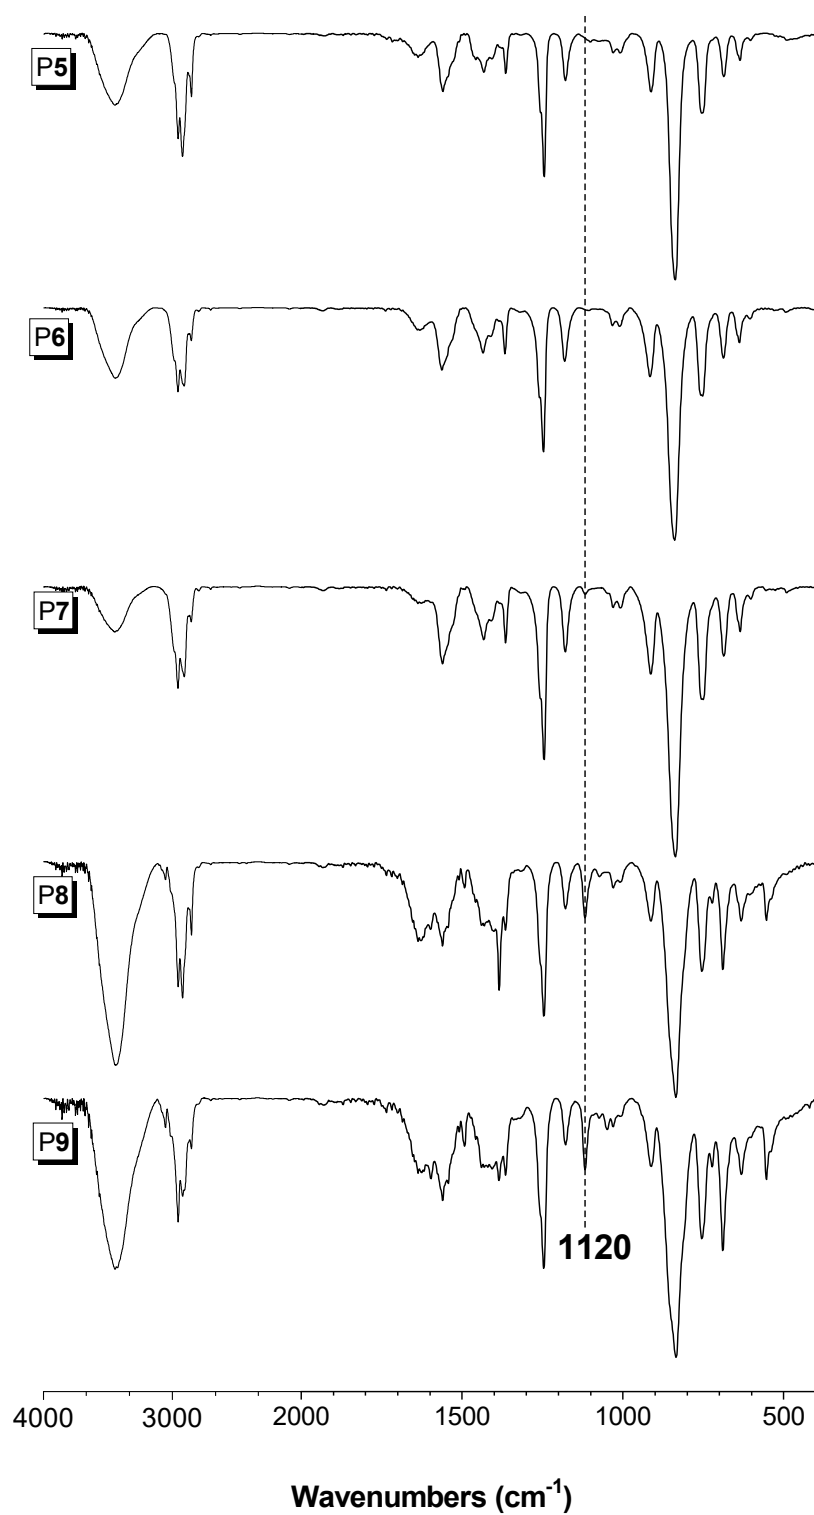

**Figure S3.** FTIR spectra of P5, P6, P7, P8 and P9 in KBr pellets.

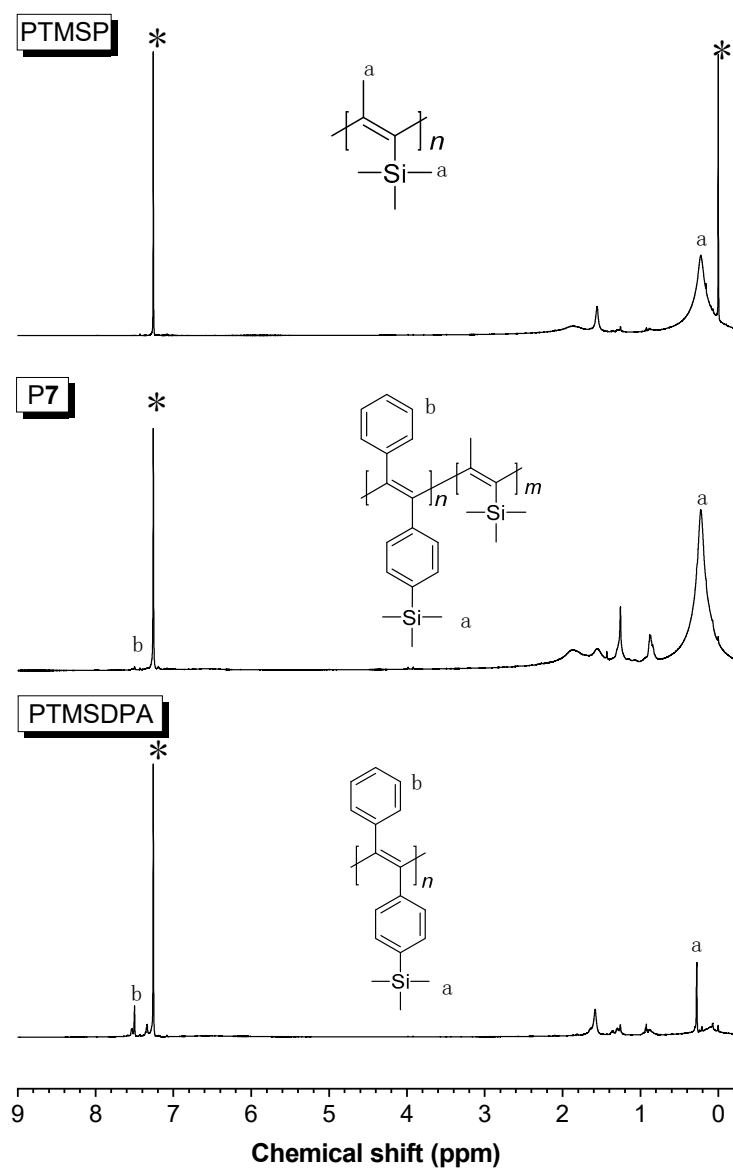

**Figure S4.**  $^1\text{H}$  NMR spectra of PTMSP, P7 and PTMSDPA ( $\text{CDCl}_3$ ). The asterisks represent solvent peaks.

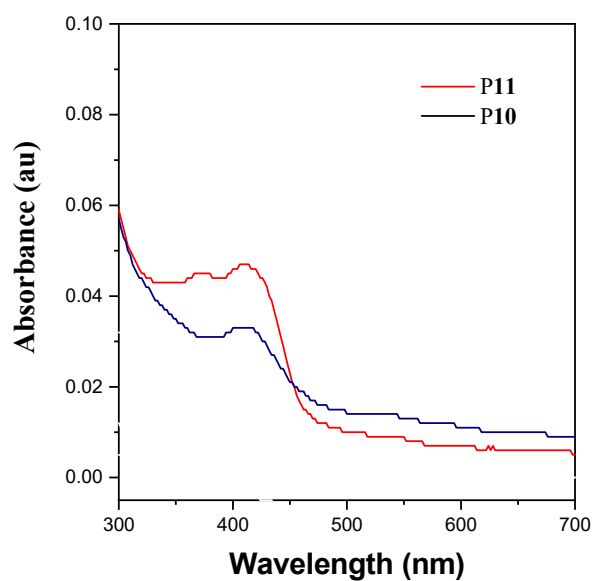

**Figure S5.** UV-vis spectra of **P10** and **P11** in THF solution with concentration of 10  $\mu$ M.

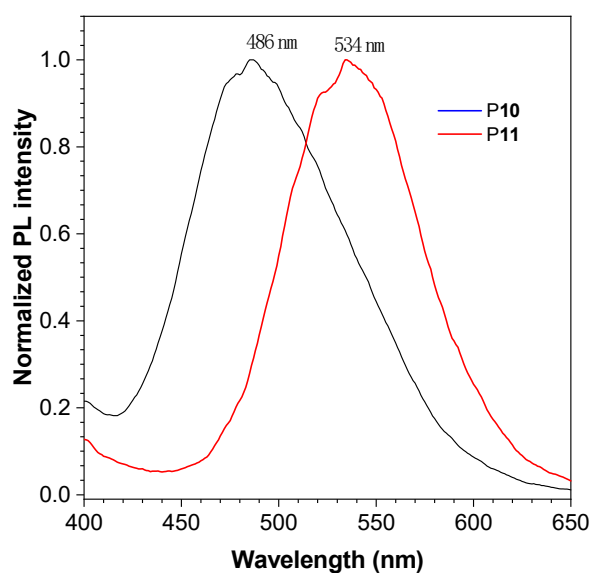

**Figure S6.** PL spectra of **P10** and **P11** powders.  $\lambda_{\text{ex}} = 375$  nm.

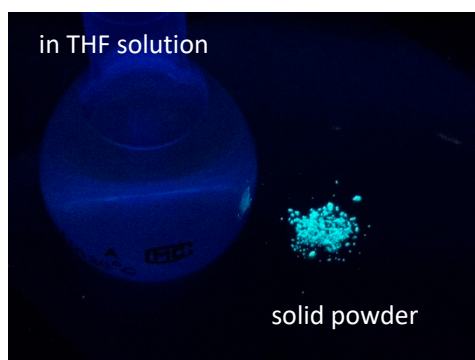

**Figure S7** Fluorescence photos of **P6** in THF solution ( $10^{-3}$  M) and powder under 365nm light.

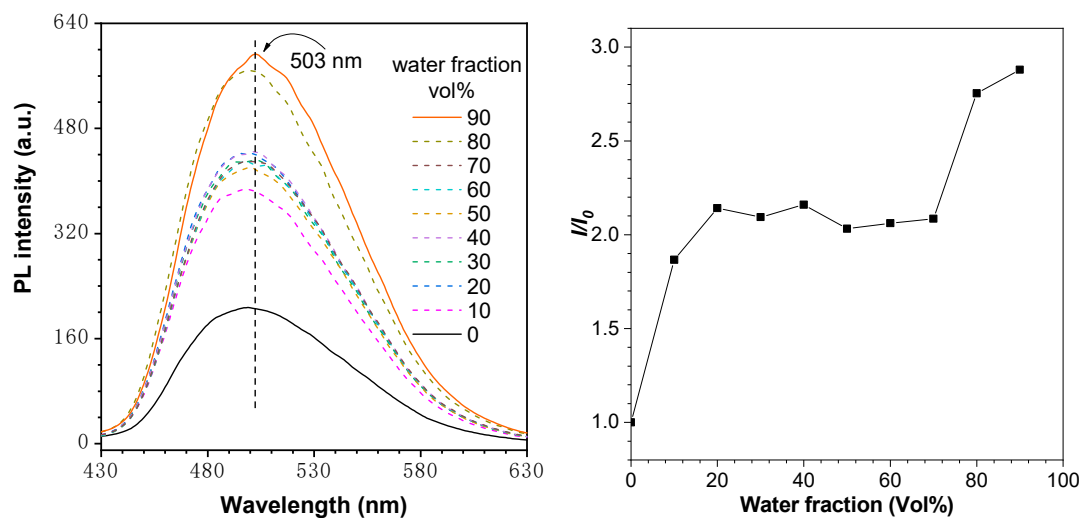

**Figure S8.** (Left) PL behavior of P7 in THF/water mixtures with different water fractions ( $f_w$ ). (Right) Plot of peak intensity of P7 in THF/water mixtures with different water fractions.  $I_0$  = Peak intensity of P7 when  $f_w = 0$ ;  $I$  = Peak intensity of P7 when  $f_w \neq 0$ .  $\lambda_{ex} = 375$  nm, Concentration = 100  $\mu$ M.

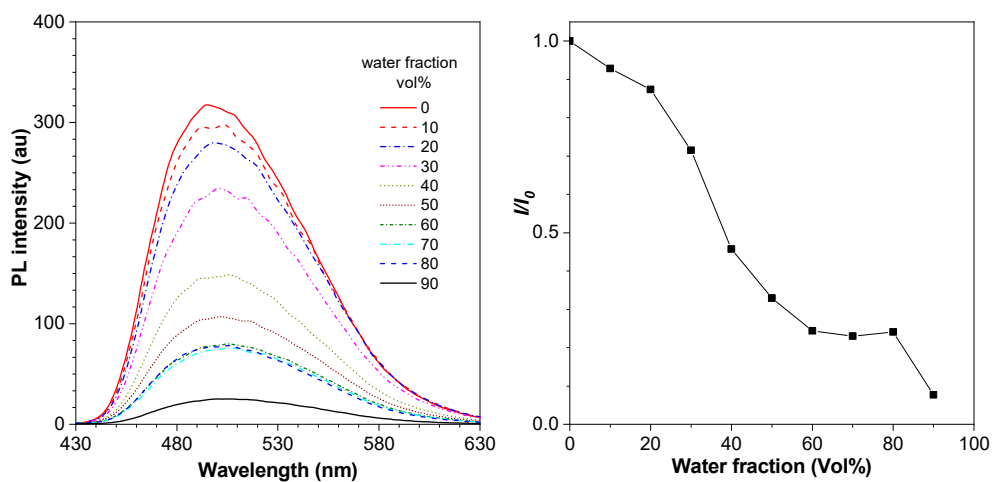

**Figure S9.** (Left) PL behavior of PTMSDPA in THF/water mixtures with different water fractions ( $f_w$ ). (Right) Plot of peak intensity of PTMSDPA in THF/water mixtures with different water fractions.  $I_0$  = Peak intensity of PTMSDPA when  $f_w = 0$ ;  $I$  = Peak intensity of PTMSDPA when  $f_w \neq 0$ .  $\lambda_{ex} = 375$  nm, Concentration = 100  $\mu$ M.

**Table S1.** The quantum yield for the suspensions of PTMSDPA, P6 and P7<sup>a</sup>.

| Samples | Water fraction (%) | QY(%) |
|---------|--------------------|-------|
| PTMSDPA | 0                  | 21.5  |
| PTMSDPA | 90                 | 28.3  |
| P6      | 0                  | -     |
| P6      | 90                 | 20.8  |
| P7      | 0                  | 24.9  |
| P7      | 90                 | 17.8  |

<sup>a</sup> QY = quantum yield. [M] = 100  $\mu$ M.  $\lambda_{\text{ex}}$  = 375 nm.
